# Supplementary material for: Landelijke ambities versus lokale uitwerking: gemeentelijk gezondheidsbeleid en lokale tabaksontmoediging laten te wensen over
Source: Springer Nature journal article supplement (doi:10.1007/s12508-022-00354-x), 2022-06-27
Supplement: MOESM1 [file 23213408]

**Handleiding codeboek -** *Landelijke ambities versus lokale uitwerking: gemeentelijk gezondheidsbeleid en lokale tabaksontmoediging laten te wensen over*

***Codeboek Naleving Wet Publieke gezondheid (2008)***

| **Variabelen** | **Punten** |
| --- | --- |
| 1. Nota gemeentelijke gezondheidsbeleid | 1 pt: Gemeente heeft een Nota gemeentelijke gezondheidsbeleid |
| 0 pt: Gemeente heeft geen Nota gemeentelijke gezondheidsbeleid |
| Vraag niet invullen: Geen nota gezondheidsbeleid kunnen vinden en niet gereageerd op ons verzoek per mail |
| 1. Nieuwheid | 2 pt: Beleid dateert uit 2016≥ |
| 1 pt: Beleid dateert uit ≤2015 |
| 0 pt: Geen beleid |
| 1. Inachtneming landelijke prioriteiten | 1 pt: Landelijke prioriteiten worden in acht genomen |
| 0 pt: Landelijke prioriteiten worden niet in acht genomen |
| 1. GGD | 1 pt: De nota vermeldt hoe de GGD om advies wordt gevraagd (art. 16 Wpg) |
| 0 pt: De nota vermeldt niet hoe de GGD om advies wordt gevraagd (art. 16 Wpg) |
| 1. Gemeentelijke doelstellingen ter uitvoering van de in de artikelen 2, 5, 5a en 6 genoemde taken | 1 pt: Beleid bevat doelstellingen ter uitvoering van de in de artikelen 2, 5, 5a en 6 genoemde taken |
| 0 pt: Beleid bevat geen doelstellingen |
| 1. Acties ter realisering doelstellingen | 1 pt: Beleid bevat acties ter realisering van de genoemde doelstellingen |
| 0 pt: Beleid bevat geen acties ter realisering van de genoemde doelstellingen |
| 1. Gewenste resultaten | 1 pt: Beleid bevat de resultaten die de gemeente wenst te behalen |
| 0 pt: Beleid bevat geen resultaten die de gemeente wenst te behalen |

**Handleiding codeboek:**

Het merendeel van de variabelen is binair: twee categorieën die staan voor afwezigheid van de variabele (0 punten) of aanwezigheid van de variabele (1 punt). Variabele (B) ‘Nieuwheid’ behoeft echter meer nuance. Deze variabele heeft drie categorieën, omdat het niet gaat om het wel of niet hebben van beleid, maar om de datering van het beleid, waarbij geen beleid één van de drie categorieën is. Op deze variabele kunnen gemeenten daarom 0, 1 of 2 punten scoren. Hieronder wordt per variabele nader uitgelegd hoe de codering heeft plaatsgevonden:

1. Art. 13 lid 2 Wpg bepaalt dat de gemeenteraad een nota gemeentelijk gezondheidsbeleid vaststelt.
2. Art. 13 lid 2 Wpg bepaalt dat de gemeenteraad binnen twee jaar de nota gemeentelijk gezondheidsbeleid vaststelt. Er zijn twee landelijke nota relevant voor dit onderzoek, de ene dateert van 2016-2019, de gemeentelijke nota dient uiterlijk 2018 te zijn opgesteld. De andere dateert 2020-2024. De gemeentelijke nota dient uiterlijk 2022 te zijn opgesteld. Wij kijken naar de datum dat het beleid is opgesteld.
3. Art. 13 lid 3 Wpg verplicht het in acht nemen van de landelijke prioriteiten, zoals opgenomen in de landelijke nota gezondheidsbeleid. Afhankelijk van de datum van het beleid, kijken wij naar de landelijke gezondheidsnota 2016-2019 of die uit 2020-2024.
4. Art. 13 lid 2 sub d Wpg bepaalt dat de nota omschrijft hoe het college van B&W uitvoering geeft aan de in art. 16 genoemde verplichting. Art. 16 Wpg bepaalt dat het college advies vraagt aan de GGD voordat besluiten worden genomen die belangrijke gevolgen kunnen hebben voor de publieke gezondheidszorg.
5. De gemeentelijke doelstellingen ter uitvoering van art. 2, 5, 5a, en 6 moeten ex art. 13 lid 2 sub a Wpg in het gezondheidsbeleid worden opgenomen. Deze artikelen zien niet op roken, maar op preventieprogramma’s, jeugdgezondheidszorg, ouderengezondheidszorg en infectieziektebestrijding.
6. Art. 13 lid 2 sub b Wpg verplicht het opnemen van de acties die de gemeente gaat ondernemen om de doelstellingen te behalen, in de nota gemeentelijk gezondheidsbeleid.
7. Art. 13 lid 2 sub c Wpg verplicht het opnemen de gewenste resultaten die de gemeente wenst te behalen, in de nota gemeentelijk gezondheidsbeleid. Wij kijken enkel naar de vraag of meetbare resultaten zijn opgenomen in het beleid.

***Codeboek Inzet voor tabaksontmoediging***

| **Variabelen** | **Punten** |
| --- | --- |
| 1. Nota gemeentelijke gezondheidsbeleid | 2 pt: Heeft nota gezondheidsbeleid |
| 1 pt: Bezig met het opstellen van een nota gezondheidsbeleid |
| 0 pt: Geen nota gezondheidsbeleid |
| Niet invullen: Geen nota gezondheidsbeleid kunnen vinden en niet gereageerd op ons verzoek per mail |
| 1. Gemeentelijke doelstellingen t.a.v. tabaksontmoediging | 1 pt: Nota (of andere beleidsdocumenten) noemt doelstellingen t.a.v. tabaksontmoediging |
| 0 pt: Nota (of andere beleidsdocumenten) noemt geen doelstellingen t.a.v. tabaksontmoediging |
| 1. Acties ter realisering doelstellingen t.a.v. tabaksontmoediging | 1 pt: Nota (of andere beleidsdocumenten) bevat acties ter realisering van de genoemde doelstellingen |
| 0 pt: Nota (of andere beleidsdocumenten) bevat geen acties ter realisering van de genoemde doelstellingen |
| 1. Gewenste resultaten t.a.v. tabaksontmoediging | 1 pt: Nota (of andere beleidsdocumenten) bevat resultaten die de gemeente wenst te behalen |
| 0 pt: Nota (of andere beleidsdocumenten) bevat geen resultaten die de gemeente wenst te behalen |
| 1. Rookvrije Generatie | 1 pt: Rookvrije Generatie wordt genoemd in de nota of andere beleidsdocumenten |
| 0 pt: Rookvrije Generatie wordt niet genoemd in de nota of andere beleidsdocumenten |
| 1. Beleid rookvrije omgeving (anders dan wettelijk verplicht is) | 2 pt: (De aanwijzing van) rookvrije openbare ruimtes zijn opgenomen in de APV of een andere autonome verordening  = formele/juridische rookvrije zones |
| 1 pt: Rookvrije openbare ruimtes worden gerealiseerd door afspraken te maken met partijen zoals speeltuinen en sportverenigingen, door geld en materialen beschikbaar te stellen of door zelf rookvrije borden op te hangen  = informele rookvrije zones |
| 0 pt: Geen rookvrije openbare ruimtes anders dan wettelijk verplicht |
| 1. Jaarlijks budget | 1 pt: Gemeente heeft een jaarlijks budget voor anti-rookcampagnes opgenomen in het beleid |
| 0 pt: Gemeente heeft geen jaarlijks budget voor anti-rookcampagnes/tabaksontmoediging opgenomen in het beleid |
| 1. Lokaal preventie-akkoord en andere initiatieven | 2 pt: Gemeente heeft een lokaal preventie-akkoord gesloten en/of is andere initiatieven gestart dan wel samenwerkingsverbanden aangegaan (zoals een convenant, een preventie agenda, of het organiseren van voorlichtingen) |
| 1 pt: Gemeente is bezig met het opstellen van een lokaal preventie-akkoord en/of is bezig met het opstarten van andere initiatieven m.b.t. tabaksontmoediging dan wel samenwerkingsverbanden aan te gaan (zoals een convenant, een preventie agenda, of het organiseren van voorlichtingen) |
| 0 pt: Gemeente heeft geen lokaal preventie-akkoord gesloten dan wel andere initiatieven gestart m.b.t. tabaksontmoediging |

**Handleiding codeboek:**

Het merendeel van de variabelen is binair: twee categorieën die staan voor afwezigheid van de variabele (0 punten) of aanwezigheid van de variabele (1 punt). Enkele variabele behoeven echter meer nuance, zoals de variabele (F) ‘Beleid rookvrije omgeving’. Deze variabele heeft drie categorieën, omdat het niet enkel gaat om het wel of niet hebben van rookvrije zones, maar ook om het onderscheid tussen formele en informele rookvrije zones. Op deze variabelen kunnen gemeenten 0, 1 of 2 punten scoren. Hieronder wordt per variabele nader uitgelegd hoe de codering heeft plaatsgevonden:

1. Behoeft geen toelichting.
2. De gemeentelijke doelstellingen ter uitvoering van art. 2, 5, 5a, en 6 moeten ex art. 13 lid 2 sub a Wpg in het gezondheidsbeleid worden opgenomen. Deze artikelen zien niet expliciet op roken, maar op preventieprogramma’s, jeugdgezondheidszorg, ouderengezondheidszorg en infectieziektebestrijding. In het Nationaal preventieakkoord en de landelijke gezondheidsnota’s wordt tabaksontmoediging echter wel als speerpunt genoemd. Wij geven gemeenten daarom punten indien zij doelstellingen hebben opgesteld t.a.v. tabaksontmoediging, dit valt namelijk zowel onder jeugdgezondheidszorg, ouderengezondheidszorg als preventieprogramma’s opstellen.
3. De Wpg verplicht gemeenten om in het beleid op te nemen welke acties worden ondernomen om de doelstellingen te behalen. Wij geven gemeenten een punt indien zij acties hebben opgenomen t.a.v. tabaksontmoediging of de rookvrije generatie
4. Art. 13 lid 2 sub c Wpg verplicht het opnemen de gewenste resultaten die de gemeente wenst te behalen, in de nota gemeentelijk gezondheidsbeleid. Wij kijken enkel naar de vraag of meetbare resultaten zijn opgenomen in het beleid.
5. Het NPA spreekt van gemeenten die de Rookvrije Generatie met concrete doelen en activiteiten benoemen in hun Nota Publieke Gezondheid. Wij geven 1 punt als gemeenten de Rookvrije Generatie benoemen in hun Nota.
6. Er is een onderscheid te maken tussen de meer informele rookvrije zones en juridische rookverboden. Met het ophangen van borden in de openbare ruimte dat een gebied rookvrij is, kan worden bereikt dat mensen elkaar aanspreken en vragen niet te roken. Hierdoor ontstaat mogelijk een nieuwe sociale norm. In de discussie noemde een vertegenwoordiger van de gemeente Amstelveen dat zij op deze manier het plein voor het gemeentehuis rookvrij hebben gemaakt. Het ophangen van dergelijke borden kan in de praktijk goed werken om het gewenste doel te bereiken. Mocht er behoefte bestaan aan een juridische grondslag, dan kunnen gemeenten in een autonome verordening, bijvoorbeeld de algemene plaatselijke verordening, een bevoegdheid creëren om gebieden aan te wijzen waarvoor een rookverbod geldt.[[1]](#footnote-1)
7. Behoeft geen toelichting.
8. Veel gemeenten geven aan een lokaal preventieakkoord te hebben opgesteld of daarmee bezig te zijn. Daarnaast wordt er een reeks van andere initiatieven genoemd door gemeenten. Wij willen deze initiatieven niet onbesproken laten en hebben er daarom voor gekozen ook punten toe te kennen aan gemeenten die kunnen aangeven wat zij, naast bovengenoemde punten, doen om een rookvrije omgeving/generatie te realiseren.[[2]](#footnote-2)

1. Zie Rookvrije Generatie, Q&A Rookvrije openbare ruimtes, 2019. <https://rookvrijegeneratie.nl/wp-content/uploads/2019/04/Vragen-en-expert-antwoorden-rookvrije-openbare-buitenruimtes-netwerkbije....pdf> Geraadpleegd op 10 januari 2022. [↑](#footnote-ref-1)
2. Enkele voorbeelden: Het trainen van professionals zodat stoppen met roken bespreekbaar wordt, voorlichting- en ontmoedigingsactiviteiten, het opstellen van een gezondheidsagenda. [↑](#footnote-ref-2)
